# Supplementary material
Source: publisher site journal article supplement (https://www.spandidos-publications.com/5255/downloadSupplementary)

Figure S1. Arc inhibits loperamide-induced inflammation. Reverse transcription-quantitative PCR was used to measure the mRNA levels of (A) TNF- $\alpha$ , (B) IL-1 $\beta$  and (C) IL-6. \*\*P<0.01 vs. Control. ^P<0.01 vs. FC. FC, functional constipation; Arc, Arctiin.

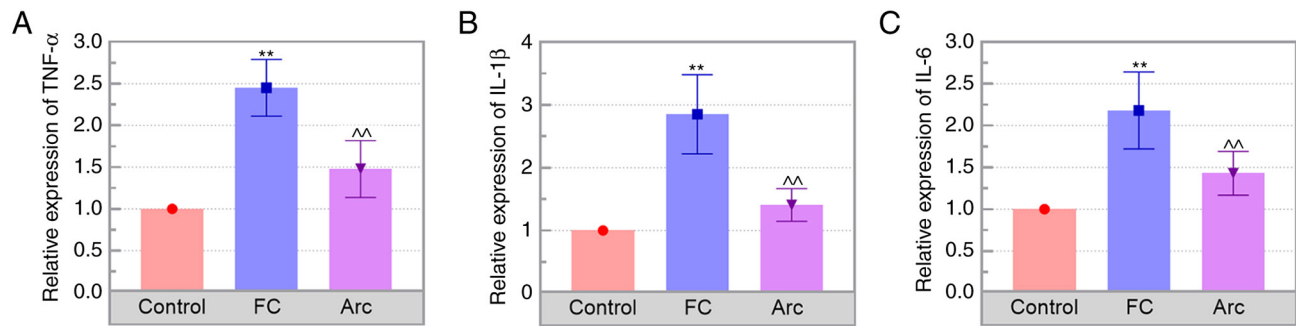

Supplement: Supplementary file 1 [file downloadSupplementary]
